# Supplementary material for: Electrochemical and in situ X-ray spectroscopic studies of MnO2/reduced graphene oxide nanocomposites as a supercapacitor
Source: Royal Society of Chemistry journal article supplement (doi:10.1039/c6cp01192f), 2016-01-01
Supplement: c6cp01192f1.pdf [file c6cp01192f1.pdf]

## Supporting Information

### **Electrochemical and in situ X-ray spectroscopic studies of MnO<sub>2</sub>/reduced graphene oxide nanocomposites as a supercapacitor**

Han-Wei Chang<sup>a,b</sup>, Ying-Rui Lu<sup>a,b,c</sup>, Jeng-Lung Chen<sup>b</sup>, Chi-Liang Chen<sup>b</sup>, Jyh-Fu Lee<sup>b</sup>,  
Jin-Ming Chen<sup>b</sup>, Yu-Chen Tsai<sup>d\*</sup>, Ping-Hung Yeh<sup>a</sup>, Wu Ching Chou<sup>e</sup>, and Chung-Li  
Dong <sup>a\*</sup>

<sup>a</sup>Department of Physics, Tamkang University, New Taipei, 25137, Taiwan

<sup>b</sup>National Synchrotron Radiation Research Center, Hsinchu, 30076, Taiwan

<sup>c</sup>Program for Science and Technology of Accelerator Light Source, National Chiao  
Tung University, Hsinchu 30010, Taiwan

<sup>d</sup>Department of Chemical Engineering, National Chung Hsing University, 250, Kuo  
Kuang Road, Taichung 402, Taiwan

<sup>e</sup>Department of Electrophysics, National Chiao Tung University, Hsinchu 30010,  
Taiwan

Figure S1 presents the pre-edge regions of the Mn K-edge XAS of (a)  $\text{MnO}_2/\text{C-CNT}$ , (b)  $\text{MnO}_2/\text{RGO}$ , and (c)  $\text{MnO}_2/\text{RGO-Au}$  electrodes at different stages of cycling. The pre-peak intensity of the  $\text{MnO}_2/\text{C-CNT}$  electrodes visibly changes during the charge process. Additionally, the pre-peak intensity of the  $\text{MnO}_2/\text{RGO}$ -based electrodes exhibits almost no change in 1000 cycles because of very slight change in the tunnel size of  $\text{MnO}_2/\text{RGO}$ -based electrodes, which enables the structure to be maintained throughout the charge/discharge processes and improves the electrochemical capacitive performance.“

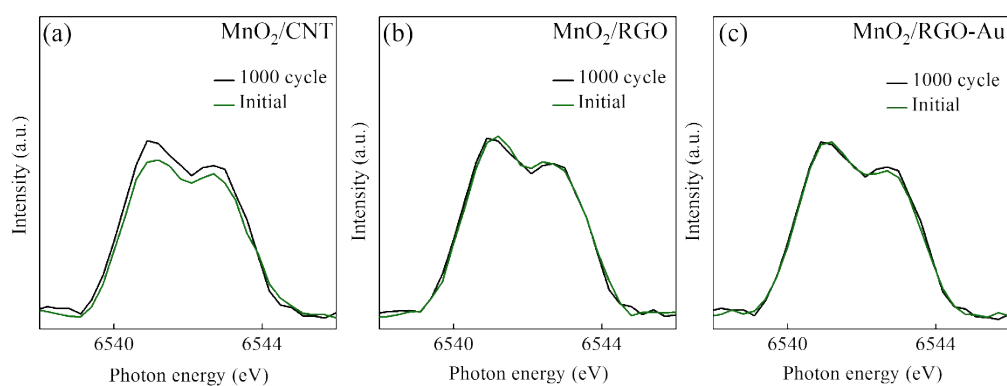

Figure S1
